# Supplementary material for: Two Pathogenic Gene Mutations Identified Associating with Congenital Cataract and Iris Coloboma Respectively in a Chinese Family
Source: Hindawi journal article supplement (doi:10.1155/2020/7054315), 2020-02-19
Supplement: f1 [file 7054315.f1.pdf]

## Supplementary materials

| Gene symbol   | Nucleotide change         | Amino acid change | Clinical phenotype                   | Ref  |
|---------------|---------------------------|-------------------|--------------------------------------|------|
| <i>CRYAA</i>  | c.35G>T                   | p. R12L           | lens protein gene                    | [1]  |
| <i>CRYAB</i>  | c.32G>A                   | p. R11H           | lens protein gene                    | [2]  |
| <i>CRYBA1</i> | c.279-281delG<br>AG       | p.ΔG91            | lens protein gene                    | [3]  |
| <i>CRYBA4</i> | c.206T>C                  | p. L69P           | lens protein gene                    | [4]  |
| <i>CRYBB1</i> | c.658G>T                  | p. G220X          | lens protein gene                    | [5]  |
| <i>CRYBB2</i> | c.563G>A                  | p. R188H          | lens protein gene                    | [6]  |
| <i>CRYBB3</i> | c.314G>A                  | p. R105Q          | lens protein gene                    | [7]  |
| <i>CRYGA</i>  | c.196T>C                  | p. Y66H           | lens protein gene                    | [8]  |
| <i>CRYGB</i>  | c.449G>T                  | p. G150V          | lens protein gene                    | [8]  |
| <i>CRYGC</i>  | c.385G>T                  | p. G129C          | lens protein gene                    | [9]  |
| <i>CRYGD</i>  | c.70C>A                   | p. P24T           | lens protein gene                    | [10] |
| <i>CRYGS</i>  | c.53G>T                   | p.G18V            | lens protein gene                    | [11] |
| <i>GJA3</i>   | c.188A>G                  | p.N63S            | membrane protein gene                | [12] |
| <i>GJA8</i>   | c.262C>T                  | p.P88S            | membrane protein gene                | [13] |
| <i>BFSP1</i>  | c736-1384_c.9<br>57-66del | T246fsX7          | cytoskeleton protein gene            | [14] |
| <i>BFSP2</i>  | c.1091G>A                 | p.G364D           | cytoskeleton protein gene            | [15] |
| <i>PAX6</i>   | c.307C>T                  | p.R103X           | developmental regulatory protein gen | [16] |
| <i>PITX3</i>  | c.38G>A                   | p.S13N            | developmental regulatory protein gen | [17] |
| <i>HSF4</i>   | c.524G>C                  | p.R175P           | developmental regulatory protein gen | [18] |
| <i>MAF</i>    | c.863G>C                  | p.R288P           | developmental regulatory protein gen | [19] |
| <i>CHMP4B</i> | c.481G>A                  | p. E161K          | chromatin modified protein gene      | [20] |
| <i>EPHA2</i>  | c.2842G>T                 | p. G948W          | tyrosine kinase receptor gene        | [21] |
| <i>COL4A1</i> | c.2345G>C                 | p. G782A          | syndrome-related genes               | [22] |
| <i>FTL</i>    | c.160G>A                  | p.E54K            | developmental regulatory protein gen | [23] |

|         |               |                 |                                      |      |
|---------|---------------|-----------------|--------------------------------------|------|
| GALK1   | c.416T>C      | p. L139P        | syndrome-related genes               | [24] |
| FYCO1   | c.808C>T      | p. Q270X        | chromatin modified protein gene      | [25] |
| NHS     | c.2739del     | p(F913Lfs*9)    | syndrome-related genes               | [25] |
| PEX11B  | c.235C>T      | p. R79T         | syndrome-related genes               | [26] |
| BCOR    | c.4706dup     | p. (G1570Rfs*7) | syndrome-related genes               | [25] |
| TDRD7   | c.688_689insA | P. Y230X        | developmental regulatory protein gen | [27] |
| LSS     | c.1741T>C     | W581R           | syndrome-related genes               | [28] |
| IARS2   | c.607G>C      | p. G203R        | syndrome-related genes               | [25] |
| PXDN    | c.2638C>T     | p. R880C        | syndrome-related genes               | [29] |
| P3H2    | c.13C>T       | p.Q5X           | developmental regulatory protein gen | [30] |
| FOXE3   | c.959G>C      | p.X320S         | developmental regulatory protein gen | [31] |
| MYH9    | c.3493C>T     | p. R1165C       | syndrome-related genes               | [32] |
| OCRL    | c.1964A>T     | p. D655V        | syndrome-related genes               | [33] |
| GCNT2   | c.1091T>C     | p.F364S         | syndrome-related genes               | [34] |
| LEMD2   | c.38T>G       | p.L13R          | syndrome-related genes               | [35] |
| FAM126A | c.169T>C      | p.C57R          | syndrome-related genes               | [36] |
| AGK     | c.421G>T      | p.E141X         | syndrome-related genes               | [37] |
| VIM     | c.596G>A      | p.E151K         | syndrome-related genes               | [38] |
| MIP     | c.572C>G      | p. P191R        | membrane protein gene                | [39] |
| CHMP4B  | c.170A>G      | p.H57R          | syndrome-related genes               | [40] |
| LIM2    | c.461G>A      | p. G154E        | membrane protein gene                | [41] |

Table S1. Reported 45 genes of non-syndromic congenital cataract with Mendelian inheritance. Genes with widely reported mutations that are associated congenital cataract, were listed with *Gene symbol, Nucleotide change, Amino acid change, Clinical phenotype, reference.*

## Reference

1. Litt M, Kramer P, LaMorticella DM, Murphey W, Lovrien EW, Weleber RG. Autosomal dominant congenital cataract associated with a missense mutation in the human alpha crystallin gene CRYAA. *Hum Mol Genet* 1998;**7**(3):471-4
2. Berry V, Francis P, Reddy MA, et al. Alpha-B crystallin gene (CRYAB) mutation causes dominant congenital posterior polar cataract in humans. *Am J Hum Genet* 2001;**69**(5):1141-5 doi: 10.1086/324158[published Online First: Epub Date]].
3. Yang G, Zhai X, Zhao J. A recurrent mutation in CRYBA1 is associated with an autosomal dominant congenital nuclear cataract disease in a Chinese family. *Mol Vis* 2011;**17**:1559-63
4. Billingsley G, Santhiya ST, Paterson AD, et al. CRYBA4, a novel human cataract gene, is also involved in microphthalmia. *Am J Hum Genet* 2006;**79**(4):702-9 doi: 10.1086/507712[published Online First: Epub Date]].
5. Mackay DS, Boskovska OB, Knopf HL, Lampi KJ, Shiels A. A nonsense mutation in CRYBB1 associated with autosomal dominant cataract linked to human chromosome 22q. *Am J Hum Genet* 2002;**71**(5):1216-21 doi: 10.1086/344212[published Online First: Epub Date]].
6. Gill D, Klose R, Munier FL, et al. Genetic heterogeneity of the Coppock-like cataract: a mutation in CRYBB2 on chromosome 22q11.2. *Invest Ophthalmol Vis Sci* 2000;**41**(1):159-65
7. Li D, Wang S, Ye H, et al. Distribution of gene mutations in sporadic congenital cataract in a Han Chinese population. *Mol Vis* 2016;**22**:589-98
8. Mehra S, Kapur S, Vasavada AR. Polymorphisms of the gamma crystallin A and B genes among Indian patients with pediatric cataract. *J Postgrad Med* 2011;**57**(3):201-5 doi: 10.4103/0022-3859.85205[published Online First: Epub Date]].
9. Li XQ, Cai HC, Zhou SY, et al. A novel mutation impairing the tertiary structure and stability of gammaC-crystallin (CRYGC) leads to cataract formation in humans and zebrafish lens. *Hum Mutat* 2012;**33**(2):391-401 doi: 10.1002/humu.21648[published Online First: Epub Date]].
10. Gu F, Li R, Ma XX, Shi LS, Huang SZ, Ma X. A missense mutation in the gammaD-crystallin gene CRYGD associated with autosomal dominant congenital cataract in a Chinese family. *Mol Vis* 2006;**12**:26-31
11. Sun H, Ma Z, Li Y, et al. Gamma-S crystallin gene (CRYGS) mutation causes dominant progressive cortical cataract in humans. *J Med Genet* 2005;**42**(9):706-10 doi: 10.1136/jmg.2004.028274[published Online First: Epub Date]].
12. Mackay D, Ionides A, Kibar Z, et al. Connexin46 mutations in autosomal dominant congenital cataract. *Am J Hum Genet* 1999;**64**(5):1357-64 doi: 10.1086/302383[published Online First: Epub Date]].
13. Shiels A, Mackay D, Ionides A, Berry V, Moore A, Bhattacharya S. A missense mutation in the

human connexin50 gene (GJA8) underlies autosomal dominant "zonular pulverulent" cataract, on chromosome 1q. *Am J Hum Genet* 1998;**62**(3):526-32 doi: 10.1086/301762[published Online First: Epub Date]].

14. Ramachandran RD, Perumalsamy V, Hejtmancik JF. Autosomal recessive juvenile onset cataract associated with mutation in BFSP1. *Hum Genet* 2007;**121**(3-4):475-82 doi: 10.1007/s00439-006-0319-6[published Online First: Epub Date]].
15. Ma X, Li FF, Wang SZ, Gao C, Zhang M, Zhu SQ. A new mutation in BFSP2 (G1091A) causes autosomal dominant congenital lamellar cataracts. *Mol Vis* 2008;**14**:1906-11
16. Dansault A, David G, Schwartz C, et al. Three new PAX6 mutations including one causing an unusual ophthalmic phenotype associated with neurodevelopmental abnormalities. *Mol Vis* 2007;**13**:511-23
17. Semina EV, Ferrell RE, Mintz-Hittner HA, et al. A novel homeobox gene PITX3 is mutated in families with autosomal-dominant cataracts and ASMD. *Nat Genet* 1998;**19**(2):167-70 doi: 10.1038/527[published Online First: Epub Date]].
18. Forshew T, Johnson CA, Khaliq S, et al. Locus heterogeneity in autosomal recessive congenital cataracts: linkage to 9q and germline HSF4 mutations. *Hum Genet* 2005;**117**(5):452-9 doi: 10.1007/s00439-005-1309-9[published Online First: Epub Date]].
19. Jamieson RV, Perveen R, Kerr B, et al. Domain disruption and mutation of the bZIP transcription factor, MAF, associated with cataract, ocular anterior segment dysgenesis and coloboma. *Hum Mol Genet* 2002;**11**(1):33-42
20. Shiels A, Bennett TM, Knopf HL, et al. CHMP4B, a novel gene for autosomal dominant cataracts linked to chromosome 20q. *Am J Hum Genet* 2007;**81**(3):596-606 doi: 10.1086/519980[published Online First: Epub Date]].
21. Shiels A, Bennett TM, Knopf HL, et al. The EPHA2 gene is associated with cataracts linked to chromosome 1p. *Mol Vis* 2008;**14**:2042-55
22. Xia XY, Li N, Cao X, et al. A novel COL4A1 gene mutation results in autosomal dominant non-syndromic congenital cataract in a Chinese family. *BMC Med Genet* 2014;**15**:97 doi: 10.1186/s12881-014-0097-2[published Online First: Epub Date]].
23. Balta B, Erdogan M, Kiraz A, Korkmaz S, Agadayi A. Frequent Mutation in the FTL Gene Causing Hyperferritinemia Cataract Syndrome in Turkish Population Is c.-160A>G. *Turk J Haematol* 2019;**36**(1):25-28 doi: 10.4274/tjh.galenos.2018.2018.0194[published Online First: Epub Date]].
24. Churchill A, Graw J. Clinical and experimental advances in congenital and paediatric cataracts. *Philos Trans R Soc Lond B Biol Sci* 2011;**366**(1568):1234-49 doi: 10.1098/rstb.2010.0227[published Online First: Epub Date]].
25. Li J, Leng Y, Han S, et al. Clinical and genetic characteristics of Chinese patients with familial or sporadic pediatric cataract. *Orphanet J Rare Dis* 2018;**13**(1):94 doi: 10.1186/s13023-018-0828-0[published Online First: Epub Date]].
26. Taylor RL, Handley MT, Waller S, et al. Novel PEX11B Mutations Extend the Peroxisome Biogenesis Disorder 14B Phenotypic Spectrum and Underscore Congenital Cataract as an Early Feature. *Invest Ophthalmol Vis Sci* 2017;**58**(1):594-603 doi: 10.1167/iops.16-21026[published Online First: Epub Date]].
27. Tan YQ, Tu C, Meng L, et al. Loss-of-function mutations in TDRD7 lead to a rare novel syndrome combining congenital cataract and nonobstructive azoospermia in humans. *Genet Med* 2017

- doi: 10.1038/gim.2017.130[published Online First: Epub Date]].
28. Zhao L, Chen XJ, Zhu J, et al. Lanosterol reverses protein aggregation in cataracts. *Nature* 2015;**523**(7562):607-11 doi: 10.1038/nature14650[published Online First: Epub Date]].
  29. Khan K, Rudkin A, Parry DA, et al. Homozygous mutations in PXDN cause congenital cataract, corneal opacity, and developmental glaucoma. *Am J Hum Genet* 2011;**89**(3):464-73 doi: 10.1016/j.ajhg.2011.08.005[published Online First: Epub Date]].
  30. Guo H, Tong P, Peng Y, et al. Homozygous loss-of-function mutation of the LEPREL1 gene causes severe non-syndromic high myopia with early-onset cataract. *Clin Genet* 2014;**86**(6):575-9 doi: 10.1111/cge.12309[published Online First: Epub Date]].
  31. Bremond-Gignac D, Bitoun P, Reis LM, Copin H, Murray JC, Semina EV. Identification of dominant FOXE3 and PAX6 mutations in patients with congenital cataract and aniridia. *Mol Vis* 2010;**16**:1705-11
  32. Economou M, Batzios SP, Pecci A, et al. MYH9-related disorders: report on a patient of Greek origin presenting with macroscopic hematuria and presenile cataract, caused by an R1165C mutation. *J Pediatr Hematol Oncol* 2012;**34**(6):412-5 doi: 10.1097/MPH.0b013e318257a64b[published Online First: Epub Date]].
  33. Shalaby AK, Emery-Billcliff P, Baralle D, et al. Identification and functional analysis of a novel oculocerebrorenal syndrome of Lowe (OCRL) gene variant in two pedigrees with varying phenotypes including isolated congenital cataract. *Mol Vis* 2018;**24**:847-52
  34. Javadiyan S, Craig JE, Souzeau E, et al. High-Throughput Genetic Screening of 51 Pediatric Cataract Genes Identifies Causative Mutations in Inherited Pediatric Cataract in South Eastern Australia. *G3 (Bethesda)* 2017;**7**(10):3257-68 doi: 10.1534/g3.117.300109[published Online First: Epub Date]].
  35. Boone PM, Yuan B, Gu S, et al. Hutterite-type cataract maps to chromosome 6p21.32-p21.31, cosegregates with a homozygous mutation in LEMD2, and is associated with sudden cardiac death. *Mol Genet Genomic Med* 2016;**4**(1):77-94 doi: 10.1002/mgg3.181[published Online First: Epub Date]].
  36. Traverso M, Assereto S, Gazzero E, et al. Novel FAM126A mutations in hypomyelination and congenital cataract disease. *Biochem Biophys Res Commun* 2013;**439**(3):369-72 doi: 10.1016/j.bbrc.2013.08.077[published Online First: Epub Date]].
  37. Aldahmesh MA, Khan AO, Mohamed JY, Alghamdi MH, Alkuraya FS. Identification of a truncation mutation of acylglycerol kinase (AGK) gene in a novel autosomal recessive cataract locus. *Hum Mutat* 2012;**33**(6):960-2 doi: 10.1002/humu.22071[published Online First: Epub Date]].
  38. Muller M, Bhattacharya SS, Moore T, et al. Dominant cataract formation in association with a vimentin assembly disrupting mutation. *Hum Mol Genet* 2009;**18**(6):1052-7 doi: 10.1093/hmg/ddn440[published Online First: Epub Date]].
  39. Yuan C, Han T, Su P, et al. A novel MIP mutation in a Chinese family with congenital cataract. *Ophthalmic Genet* 2018;**39**(4):473-76 doi: 10.1080/13816810.2018.1484930[published Online First: Epub Date]].
  40. Zhang XH, Da Wang J, Jia HY, et al. Mutation profiles of congenital cataract genes in 21 northern Chinese families. *Mol Vis* 2018;**24**:471-77
  41. Ponnamp SP, Ramesha K, Tejwani S, Matalia J, Kannabiran C. A missense mutation in LIM2 causes autosomal recessive congenital cataract. *Mol Vis* 2008;**14**:1204-8
